# Supplementary material for: Oncogenic Ras is downregulated by ARHI and induces autophagy by Ras/AKT/mTOR pathway in glioblastoma
Source: Springer Nature journal article supplement (doi:10.1186/s12885-019-5643-z), 2019-05-14
Supplement: MOESM1 [file 16723390]

| Features pathological diagnoses | WHO II | WHO III | WHO IV |
|---------------------------------|--------|---------|--------|
| No. of patient                  | 3      | 3       | 3      |
| Mean age (year)                 | 43.3   | 51.6    | 45.6   |
| Gender                          |        |         |        |
| Male                            | 2      | 1       | 1      |
| Female                          | 1      | 2       | 2      |
| Tumor location                  |        |         |        |
| Supratentorial                  | 3      | 3       | 3      |
| Tumor size(cm)                  |        |         |        |
| <3                              | 1      | 0       | 1      |
| >3                              | 2      | 3       | 2      |
| KPS                             |        |         |        |
| >80                             | 2      | 2       | 3      |
| <80                             | 1      | 1       | 0      |
| Alive                           | 2      | 1       | 0      |
| Average survival data(month)    | 49.5   | 32.7    | 10.2   |
